# Supplementary material for: Syntheses, structures, and magnetic properties of a series of Mn-containing coordination polymers based on 5-nitro-1,2,3-benzenetricarboxylic acid and different N-donor ligands
Source: Royal Society of Chemistry journal article supplement (doi:10.1039/c3ce40772a), 2013-01-01
Supplement: c3ce40772a.pdf [file c3ce40772a.pdf]

## Supporting information

### Syntheses, Structures, and Magnetic Properties of a Series of Mn-containing Coordination Polymers Based on 5-nitro-1,2,3-benzenetricarboxylic Acid and Different N-Donor Ligands

Yuting Yang,\* Changzheng Tu, Feixiang Cheng and Fan Wang

College of Chemistry and Chemical Engineering, Qujing Normal University, Qujing, 655011, People's Republic of China

\*Corresponding author: E-mail: yangyt8002@gmail.com; Fax : +86-874-8965132

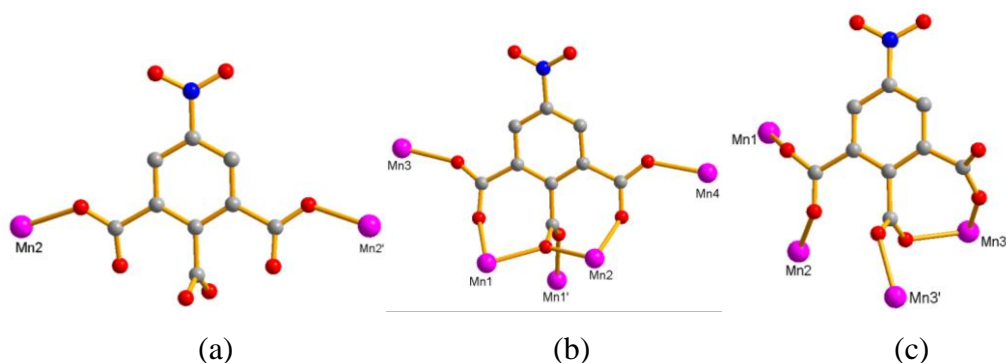

Fig. S1 Coordination modes of H<sub>3</sub>nbtta in complex **1** ((a)  $\mu_2: \eta^1: \eta^0: \eta^1$ , (b)  $\mu_5: \eta^2: \eta^3: \eta^2$ , (c)  $\mu_4: \eta^2: \eta^2: \eta^1$ )

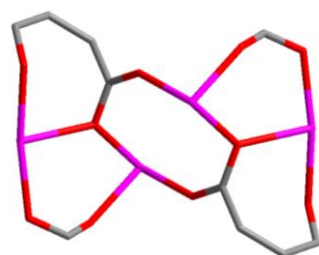

Fig. S2 Mn<sub>4</sub> core constructed by {Mn1}<sub>2</sub> dimer and two Mn2 atoms.

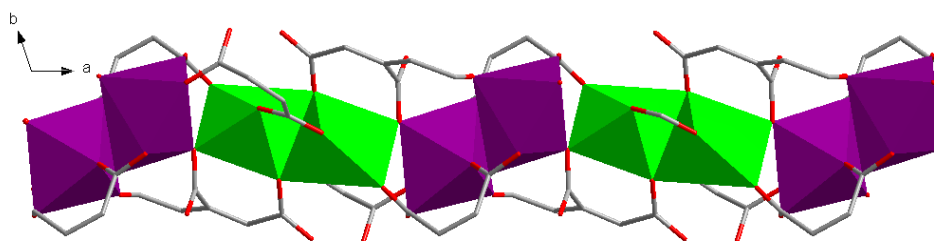

Fig. S3 One dimensional chains constructed by the octahedra of [Mn<sub>2</sub>O<sub>6</sub>] (green) and [Mn<sub>3</sub>O<sub>6</sub>] (purple).

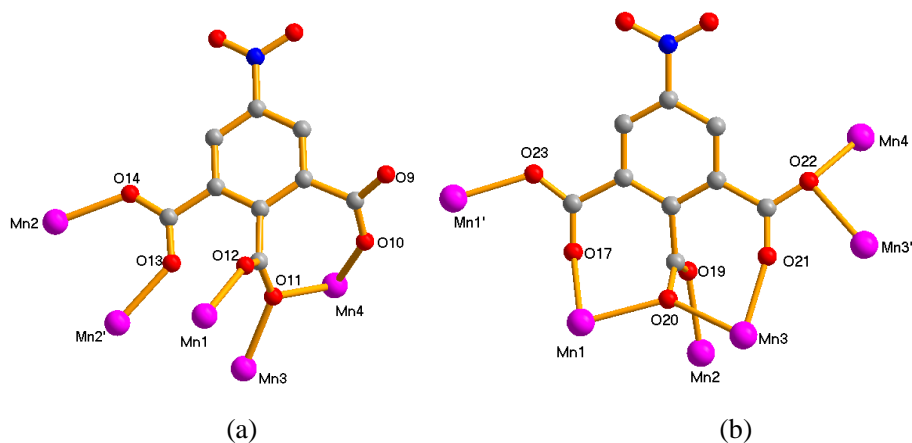

Fig. S4 Coordination modes of H<sub>3</sub>nbta in complex **2** ((a)  $\mu_5: \eta^2: \eta^3: \eta^1$ , (b)  $\mu_6: \eta^2: \eta^3: \eta^3$ ).

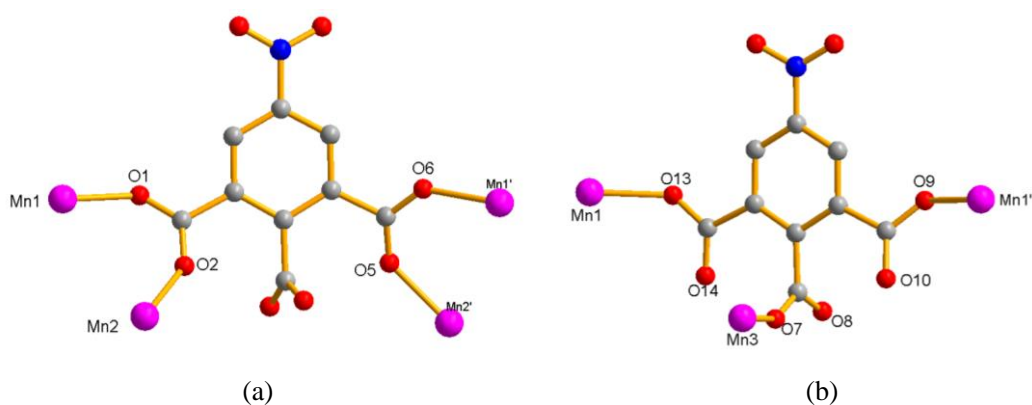

Fig. S5 Coordination modes of H<sub>3</sub>nbta in complex **3** ((a)  $\mu_4: \eta^2: \eta^0: \eta^2$ , (b)  $\mu_3: \eta^1: \eta^1: \eta^1$ ).

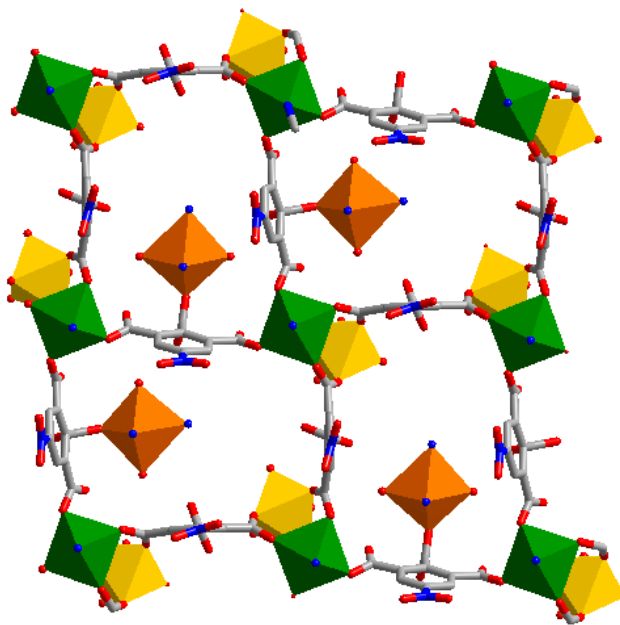

Fig. S6 2D Mn<sub>2</sub>(nbta)<sub>3</sub> sheet of complex **3**.

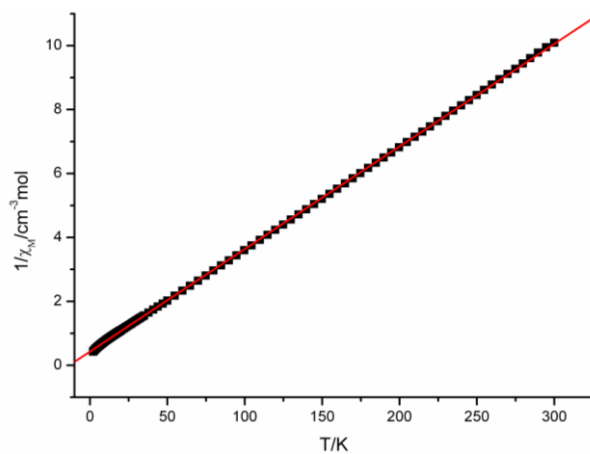

(a)

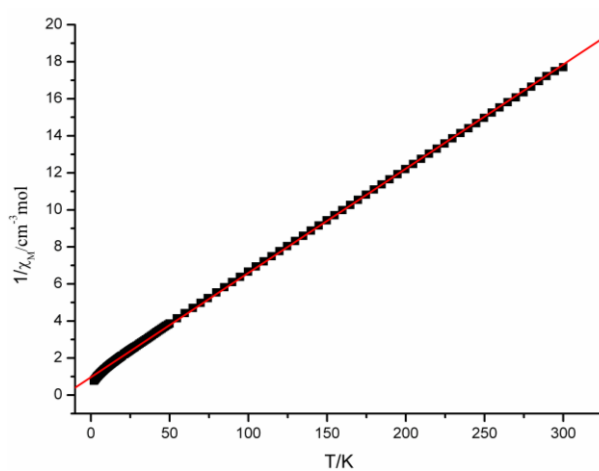

(b)

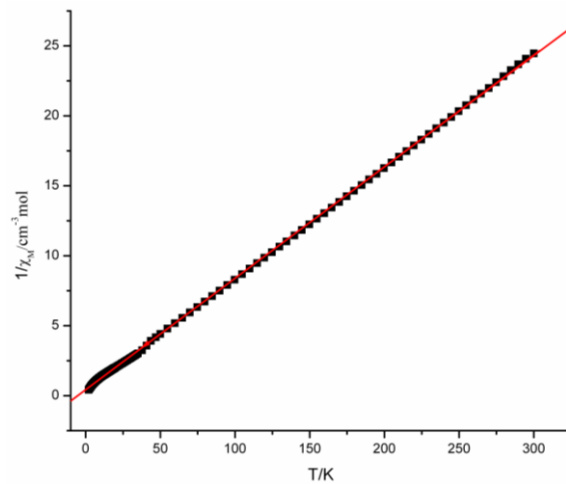

(c)

Fig. S7 Temperature dependence of  $1/\chi_M$  vs.  $T$  for complexes **1** - **3**: (a) for **1**, (b) for **2**, (c) for **3**. The red lines show the Curie – Weiss fitting.

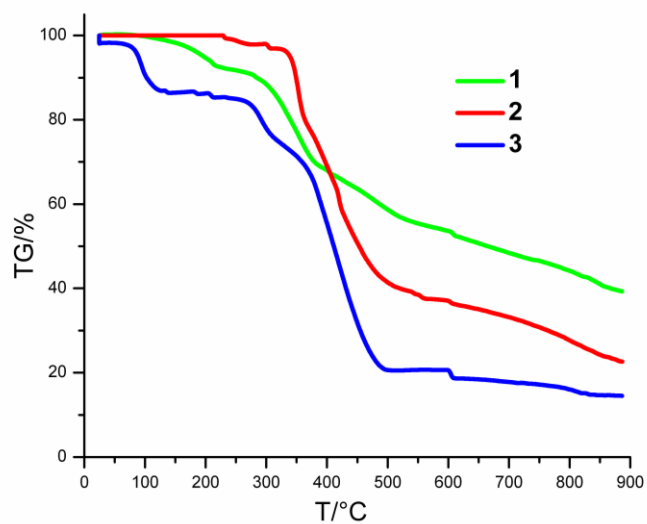

Fig. S8 TG plots of complexes **1-3**.

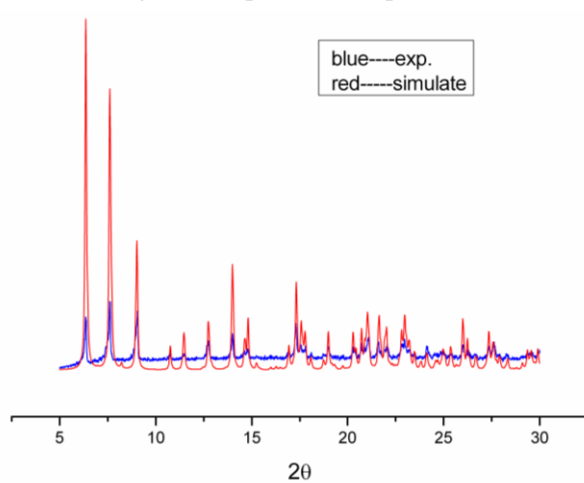

(a)

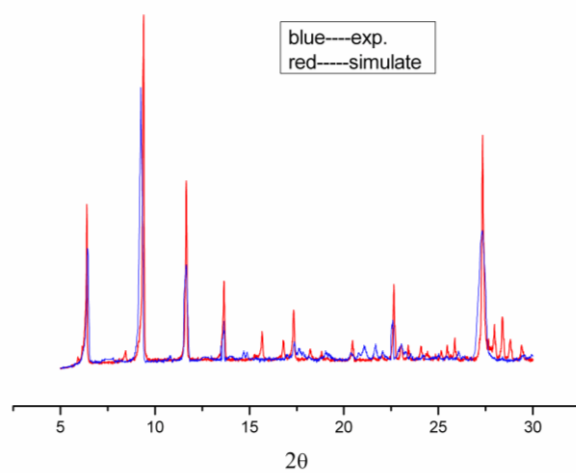

(b)

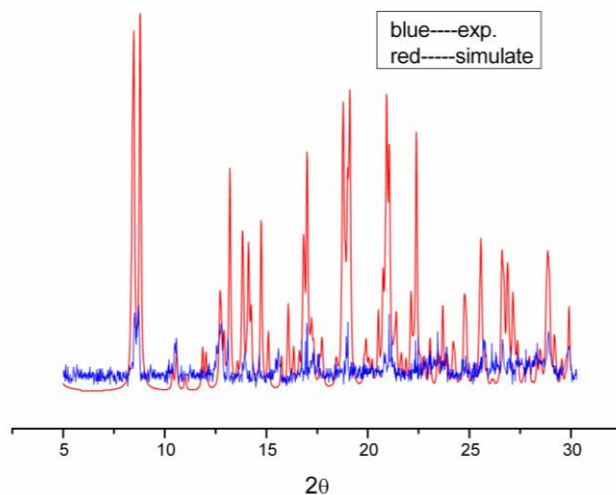

(c)

Fig. S9 The exp. and simulated PXRD patterns of **1** (a), **2** (b) and **3** (c).

**Table S1 Selected bond lengths (Å) and angles (°) for 1-3.**

| <b>1</b>          |           |                    |            |
|-------------------|-----------|--------------------|------------|
| Mn(1)-O(10)       | 2.110(2)  | Mn(1)-O(2)         | 2.148(2)   |
| Mn(1)-O(4)#2      | 2.198(2)  | Mn(1)-O(3)         | 2.223(2)   |
| Mn(1)-N(4)        | 2.270(3)  | Mn(1)-N(3)         | 2.278(3)   |
| Mn(2)-O(21)       | 2.141(2)  | Mn(2)-O(18)        | 2.145(2)   |
| Mn(2)-O(9)        | 2.143(2)  | Mn(2)-O(22)        | 2.183(2)   |
| Mn(2)-O(8)        | 2.209(2)  | Mn(2)-O(3)         | 2.221(2)   |
| Mn(3)-O(13)#2     | 2.125(2)  | Mn(3)-O(15)#2      | 2.159(2)   |
| Mn(3)-O(14)#3     | 2.206(2)  | Mn(3)-N(2)         | 2.239(3)   |
| Mn(3)-O(1)        | 2.238(2)  | Mn(3)-N(1)         | 2.230(11)  |
| Mn(4)-O(23)       | 2.180(3)  | Mn(4)-O(23)#4      | 2.180(3)   |
| Mn(4)-O(24)       | 2.188(3)  | Mn(4)-O(24)#4      | 2.188(3)   |
| Mn(4)-O(7)#4      | 2.223(2)  | Mn(4)-O(7)         | 2.223(2)   |
| O(4)-Mn(1)#2      | 2.198(2)  | O(13)-Mn(3)#2      | 2.125(2)   |
| O(14)-Mn(3)#5     | 2.206(2)  | O(15)-Mn(3)#2      | 2.159(2)   |
| O(10)-Mn(1)-O(2)  | 162.87(9) | O(10)-Mn(1)-O(4)#2 | 89.72(9)   |
| O(2)-Mn(1)-O(4)#2 | 96.73(9)  | O(10)-Mn(1)-O(3)   | 82.09(8)   |
| O(2)-Mn(1)-O(3)   | 81.31(8)  | O(4)#2-Mn(1)-O(3)  | 97.97(8)   |
| O(10)-Mn(1)-N(4)  | 92.25(10) | O(2)-Mn(1)-N(4)    | 104.01(10) |
| O(4)#2-Mn(1)-N(4) | 85.79(9)  | O(3)-Mn(1)-N(4)    | 173.15(10) |
| O(10)-Mn(1)-N(3)  | 88.09(9)  | O(2)-Mn(1)-N(3)    | 91.81(9)   |
| O(4)#2-Mn(1)-N(3) | 157.51(9) | O(3)-Mn(1)-N(3)    | 103.88(9)  |
| N(4)-Mn(1)-N(3)   | 71.95(10) | O(21)-Mn(2)-O(18)  | 91.81(10)  |
| O(21)-Mn(2)-O(9)  | 88.67(10) | O(18)-Mn(2)-O(9)   | 105.89(10) |
| O(21)-Mn(2)-O(22) | 86.73(9)  | O(18)-Mn(2)-O(22)  | 168.18(10) |

|                       |            |                       |            |
|-----------------------|------------|-----------------------|------------|
| O(9)-Mn(2)-O(22)      | 85.81(9)   | O(21)-Mn(2)-O(8)      | 93.25(10)  |
| O(18)-Mn(2)-O(8)      | 88.31(9)   | O(9)-Mn(2)-O(8)       | 165.60(9)  |
| O(22)-Mn(2)-O(8)      | 80.06(9)   | O(21)-Mn(2)-O(3)      | 173.12(9)  |
| O(18)-Mn(2)-O(3)      | 93.87(9)   | O(9)-Mn(2)-O(3)       | 93.48(8)   |
| O(22)-Mn(2)-O(3)      | 86.92(8)   | O(8)-Mn(2)-O(3)       | 83.06(8)   |
| O(13)#2-Mn(3)-O(15)#2 | 86.76(9)   | O(13)#2-Mn(3)-O(14)#3 | 91.42(8)   |
| O(15)#2-Mn(3)-O(14)#3 | 99.13(9)   | O(13)#2-Mn(3)-N(2)    | 106.61(11) |
| O(15)#2-Mn(3)-N(2)    | 166.47(11) | O(14)#3-Mn(3)-N(2)    | 78.87(10)  |
| O(13)#2-Mn(3)-O(1)    | 86.31(9)   | O(15)#2-Mn(3)-O(1)    | 93.39(9)   |
| O(14)#3-Mn(3)-O(1)    | 167.13(9)  | N(2)-Mn(3)-O(1)       | 89.63(10)  |
| O(13)#2-Mn(3)-N(1)    | 167.0(3)   | O(15)#2-Mn(3)-N(1)    | 91.4(2)    |
| O(14)#3-Mn(3)-N(1)    | 101.6(3)   | N(2)-Mn(3)-N(1)       | 76.0(2)    |
| O(1)-Mn(3)-N(1)       | 81.0(3)    | O(23)-Mn(4)-O(23)#4   | 180.00(16) |
| O(23)-Mn(4)-O(24)     | 87.84(12)  | O(23)#4-Mn(4)-O(24)   | 92.16(12)  |
| O(23)-Mn(4)-O(24)#4   | 92.16(12)  | O(23)#4-Mn(4)-O(24)#4 | 87.84(12)  |
| O(24)-Mn(4)-O(24)#4   | 180.00(11) | O(23)-Mn(4)-O(7)#4    | 86.13(12)  |
| O(23)#4-Mn(4)-O(7)#4  | 93.87(12)  | O(24)-Mn(4)-O(7)#4    | 89.43(9)   |
| O(24)#4-Mn(4)-O(7)#4  | 90.57(9)   | O(23)-Mn(4)-O(7)      | 93.87(12)  |
| O(23)#4-Mn(4)-O(7)    | 86.13(12)  | O(24)-Mn(4)-O(7)      | 90.57(9)   |
| O(24)#4-Mn(4)-O(7)    | 89.43(9)   | O(7)#4-Mn(4)-O(7)     | 180.0      |
| Mn(1)-O(3)-Mn(2)      | 129.65(10) |                       |            |
| 2                     |            |                       |            |
| Mn(1)-O(1)            | 2.205(4)   | Mn(1)-N(1)            | 2.219(5)   |
| Mn(1)-O(17)           | 2.146(5)   | Mn(1)-O(25)           | 2.178(4)   |
| Mn(1)-O(11)#2         | 2.278(4)   | Mn(1)-O(13)#2         | 2.142(4)   |
| Mn(2)-O(2)            | 2.154(4)   | Mn(2)-O(18)#3         | 2.188(5)   |
| Mn(2)-O(11)#4         | 2.193(4)   | Mn(2)-O(19)           | 2.229(4)   |
| Mn(2)-O(1)#3          | 2.268(4)   | Mn(2)-O(4)            | 2.308(4)   |
| Mn(3)-O(9)            | 2.147(4)   | Mn(3)-O(10)#4         | 2.175(4)   |
| Mn(3)-O(3)            | 2.193(4)   | Mn(3)-O(19)           | 2.202(4)   |
| Mn(3)-O(21)#4         | 2.284(5)   | Mn(3)-O(21)           | 2.307(4)   |
| Mn(4)-O(5)#5          | 2.146(4)   | Mn(4)-O(6)            | 2.153(4)   |
| Mn(4)-O(12)#6         | 2.167(4)   | Mn(4)-N(5)            | 2.190(6)   |
| Mn(4)-O(22)#6         | 2.201(5)   | Mn(4)-O(4)#5          | 2.309(4)   |
| O(1)-Mn(2)#3          | 2.268(4)   | O(4)-Mn(4)#5          | 2.309(4)   |
| O(5)-Mn(4)#5          | 2.146(4)   | O(10)-Mn(3)#4         | 2.175(4)   |
| O(11)-Mn(2)#4         | 2.193(4)   | O(11)-Mn(1)#7         | 2.278(4)   |
| O(12)-Mn(4)#8         | 2.167(4)   | O(13)-Mn(1)#7         | 2.142(4)   |
| O(18)-Mn(2)#3         | 2.188(5)   | O(21)-Mn(3)#4         | 2.284(5)   |
| O(22)-Mn(4)#8         | 2.201(5)   |                       |            |
| O(13)#2-Mn(1)-O(17)   | 90.39(17)  | O(13)#2-Mn(1)-O(25)   | 98.98(17)  |
| O(17)-Mn(1)-O(25)     | 170.49(16) | O(13)#2-Mn(1)-O(1)    | 155.58(16) |
| O(17)-Mn(1)-O(1)      | 87.47(17)  | O(25)-Mn(1)-O(1)      | 84.67(16)  |
| O(13)#2-Mn(1)-N(1)    | 104.53(18) | O(17)-Mn(1)-N(1)      | 89.7(2)    |

|                       |            |                      |            |
|-----------------------|------------|----------------------|------------|
| O(25)-Mn(1)-N(1)      | 86.39(19)  | O(1)-Mn(1)-N(1)      | 99.78(18)  |
| O(13)#2-Mn(1)-O(11)#2 | 81.19(16)  | O(17)-Mn(1)-O(11)#2  | 91.42(16)  |
| O(25)-Mn(1)-O(11)#2   | 91.64(16)  | O(1)-Mn(1)-O(11)#2   | 74.55(15)  |
| N(1)-Mn(1)-O(11)#2    | 174.17(17) | O(5)#5-Mn(4)-O(4)#5  | 81.46(14)  |
| O(2)-Mn(2)-O(18)#3    | 81.61(17)  | O(2)-Mn(2)-O(11)#4   | 158.22(15) |
| O(18)#3-Mn(2)-O(11)#4 | 88.44(16)  | O(2)-Mn(2)-O(19)     | 81.85(16)  |
| O(18)#3-Mn(2)-O(19)   | 159.98(16) | O(11)#4-Mn(2)-O(19)  | 110.85(17) |
| O(2)-Mn(2)-O(1)#3     | 123.71(16) | O(18)#3-Mn(2)-O(1)#3 | 88.40(16)  |
| O(11)#4-Mn(2)-O(1)#3  | 74.99(15)  | O(19)-Mn(2)-O(1)#3   | 91.46(15)  |
| O(2)-Mn(2)-O(4)       | 77.96(15)  | O(18)#3-Mn(2)-O(4)   | 100.96(16) |
| O(11)#4-Mn(2)-O(4)    | 85.04(15)  | O(19)-Mn(2)-O(4)     | 86.50(15)  |
| O(1)#3-Mn(2)-O(4)     | 157.75(16) | O(9)-Mn(3)-O(10)#4   | 152.60(18) |
| O(9)-Mn(3)-O(3)       | 80.28(17)  | O(10)#4-Mn(3)-O(3)   | 124.13(16) |
| O(9)-Mn(3)-O(19)      | 112.36(16) | O(10)#4-Mn(3)-O(19)  | 85.10(16)  |
| O(3)-Mn(3)-O(19)      | 83.39(16)  | O(9)-Mn(3)-O(21)#4   | 81.78(16)  |
| O(10)#4-Mn(3)-O(21)#4 | 77.76(15)  | O(3)-Mn(3)-O(21)#4   | 110.99(15) |
| O(19)-Mn(3)-O(21)#4   | 161.92(14) | O(9)-Mn(3)-O(21)     | 82.45(15)  |
| O(10)#4-Mn(3)-O(21)   | 79.25(14)  | O(3)-Mn(3)-O(21)     | 151.02(15) |
| O(19)-Mn(3)-O(21)     | 81.90(15)  | O(21)#4-Mn(3)-O(21)  | 89.21(13)  |
| O(5)#5-Mn(4)-O(6)     | 101.57(16) | O(5)#5-Mn(4)-O(12)#6 | 162.94(15) |
| O(6)-Mn(4)-O(12)#6    | 91.79(15)  | O(5)#5-Mn(4)-N(5)    | 96.62(18)  |
| O(6)-Mn(4)-N(5)       | 94.24(19)  | O(12)#6-Mn(4)-N(5)   | 92.88(19)  |
| O(5)#5-Mn(4)-O(22)#6  | 79.95(16)  | O(6)-Mn(4)-O(22)#6   | 89.34(17)  |
| O(12)#6-Mn(4)-O(22)#6 | 89.75(16)  | N(5)-Mn(4)-O(22)#6   | 175.49(18) |
| O(6)-Mn(4)-O(4)#5     | 176.83(16) | O(12)#6-Mn(4)-O(4)#5 | 85.41(14)  |
| N(5)-Mn(4)-O(4)#5     | 84.42(18)  | O(22)#6-Mn(4)-O(4)#5 | 92.14(16)  |
| Mn(1)-O(1)-Mn(2)#3    | 100.46(16) | Mn(2)-O(4)-Mn(4)#5   | 133.77(17) |
| Mn(2)#4-O(11)-Mn(1)#7 | 100.52(17) | Mn(3)-O(19)-Mn(2)    | 110.47(16) |
| Mn(3)#4-O(21)-Mn(3)   | 90.79(13)  |                      |            |
| 3                     |            |                      |            |
| Mn(1)-O(6)            | 2.110(2)   | Mn(1)-O(13)          | 2.123(2)   |
| Mn(1)-O(9)            | 2.1246(19) | Mn(1)-O(15)          | 2.3951(19) |
| Mn(1)-O(1)            | 2.1657(19) | Mn(1)-N(1)           | 2.202(2)   |
| Mn(2)-O(5)            | 2.113(2)   | Mn(2)-O(45)          | 2.159(2)   |
| Mn(2)-O(2)            | 2.136(2)   | Mn(2)-O(20)          | 2.169(2)   |
| Mn(2)-O(18)           | 2.1951(19) | Mn(2)-O(15)          | 2.3095(19) |
| Mn(3)-O(19)           | 2.164(2)   | Mn(3)-O(22)          | 2.199(2)   |
| Mn(3)-O(7)            | 2.2084(19) | Mn(3)-N(5)           | 2.211(2)   |
| Mn(3)-N(2)            | 2.248(3)   | Mn(3)-O(23)          | 2.249(2)   |
| O(6)-Mn(1)-O(13)      | 91.99(9)   | O(6)-Mn(1)-O(9)      | 179.02(9)  |
| O(13)-Mn(1)-O(9)      | 88.47(8)   | O(6)-Mn(1)-O(1)      | 90.37(9)   |
| O(13)-Mn(1)-O(1)      | 173.89(8)  | O(9)-Mn(1)-O(1)      | 89.26(8)   |
| O(6)-Mn(1)-N(1)       | 87.41(9)   | O(13)-Mn(1)-N(1)     | 96.62(9)   |
| O(9)-Mn(1)-N(1)       | 91.68(9)   | O(1)-Mn(1)-N(1)      | 89.12(9)   |

|                   |            |                   |           |
|-------------------|------------|-------------------|-----------|
| O(6)-Mn(1)-O(15)  | 98.24(8)   | O(13)-Mn(1)-O(15) | 83.05(8)  |
| O(9)-Mn(1)-O(15)  | 82.67(7)   | O(1)-Mn(1)-O(15)  | 91.04(7)  |
| N(1)-Mn(1)-O(15)  | 174.34(8)  | O(5)-Mn(2)-O(2)   | 93.21(8)  |
| O(5)-Mn(2)-O(45)  | 169.62(10) | O(2)-Mn(2)-O(45)  | 96.73(10) |
| O(5)-Mn(2)-O(20)  | 90.45(9)   | O(5)-Mn(2)-O(18)  | 80.97(8)  |
| O(2)-Mn(2)-O(20)  | 84.27(8)   | O(2)-Mn(2)-O(18)  | 173.83(8) |
| O(45)-Mn(2)-O(20) | 87.56(10)  | O(45)-Mn(2)-O(18) | 89.20(9)  |
| O(20)-Mn(2)-O(18) | 97.73(8)   | O(5)-Mn(2)-O(15)  | 97.95(8)  |
| O(2)-Mn(2)-O(15)  | 85.80(7)   | O(45)-Mn(2)-O(15) | 85.80(9)  |
| O(20)-Mn(2)-O(15) | 167.33(8)  | O(18)-Mn(2)-O(15) | 92.96(7)  |
| O(19)-Mn(3)-O(22) | 167.25(9)  | O(19)-Mn(3)-O(7)  | 82.80(8)  |
| O(22)-Mn(3)-O(7)  | 87.58(8)   | O(19)-Mn(3)-N(5)  | 92.20(9)  |
| O(22)-Mn(3)-N(5)  | 96.81(10)  | O(7)-Mn(3)-N(5)   | 173.83(9) |
| O(19)-Mn(3)-N(2)  | 103.46(9)  | O(22)-Mn(3)-N(2)  | 85.68(9)  |
| O(7)-Mn(3)-N(2)   | 95.19(8)   | N(5)-Mn(3)-N(2)   | 89.48(9)  |
| O(19)-Mn(3)-O(23) | 87.18(9)   | O(22)-Mn(3)-O(23) | 84.95(9)  |
| O(7)-Mn(3)-O(23)  | 92.85(8)   | N(5)-Mn(3)-O(23)  | 83.25(9)  |
| N(2)-Mn(3)-O(23)  | 167.38(9)  | Mn(2)-O(15)-Mn(1) | 106.33(7) |

Symmetry transformations used to generate equivalent atoms for **1**: #1 -x, y, -z+1/2; #2 -x, -y+1, -z; #3 x, y-1, z; #4 -x-1/2, -y+3/2, -z; #5 x, y+1, z.

Symmetry transformations used to generate equivalent atoms for **2**: #1 -x+2, -y+1, -z+1; #2 x-1, y, z; #3 -x, -y, -z+1; #4 -x+1, -y, -z+1; #5 -x+1, -y+1, -z+1; #6 x, y+1, z; #7 x+1, y, z; #8 x, y-1, z.

Symmetry transformations used to generate equivalent atoms for **3**: #1 x, -y-1/2, z+1/2; #2 x, -y-1/2, z-1/2; #3 -x, -y, -z+2; #4 x, -y+1/2, z+1/2; #5 x, -y+1/2, z-1/2.

**Table S2 Selected Mn···Mn Distances (Å) and Mn-O-Mn Angles (°) in 1-3.**

|             |        |             |        |
|-------------|--------|-------------|--------|
| <b>1</b>    |        |             |        |
| Mn1···Mn1   | 4.672  | Mn1···Mn2   | 4.022  |
| Mn1···Mn3   | 5.854  | Mn2···Mn4   | 5.133  |
| Mn3···Mn3   | 4.609  | Mn1-O3-Mn2  | 129.66 |
| <b>2</b>    |        |             |        |
| Mn1···Mn2   | 3.438  | Mn2···Mn3   | 3.640  |
| Mn2···Mn4   | 4.426  | Mn3···Mn4   | 4.133  |
| Mn2···Mn2   | 3.872  | Mn4···Mn4   | 4.645  |
| Mn1-O1-Mn2  | 100.47 | Mn1-O11-Mn2 | 100.53 |
| Mn2-O19-Mn3 | 110.47 | Mn2-O4-Mn4  | 133.79 |
| <b>3</b>    |        |             |        |
| Mn1···Mn2   | 3.766  | Mn1-O15-Mn2 | 106.33 |
